# Supplementary material
Source: publisher figshare collection journal article supplement (https://acs.figshare.com/ndownloader/files/4506361)
Supplement: Supplementary file 1 [file 4506361]

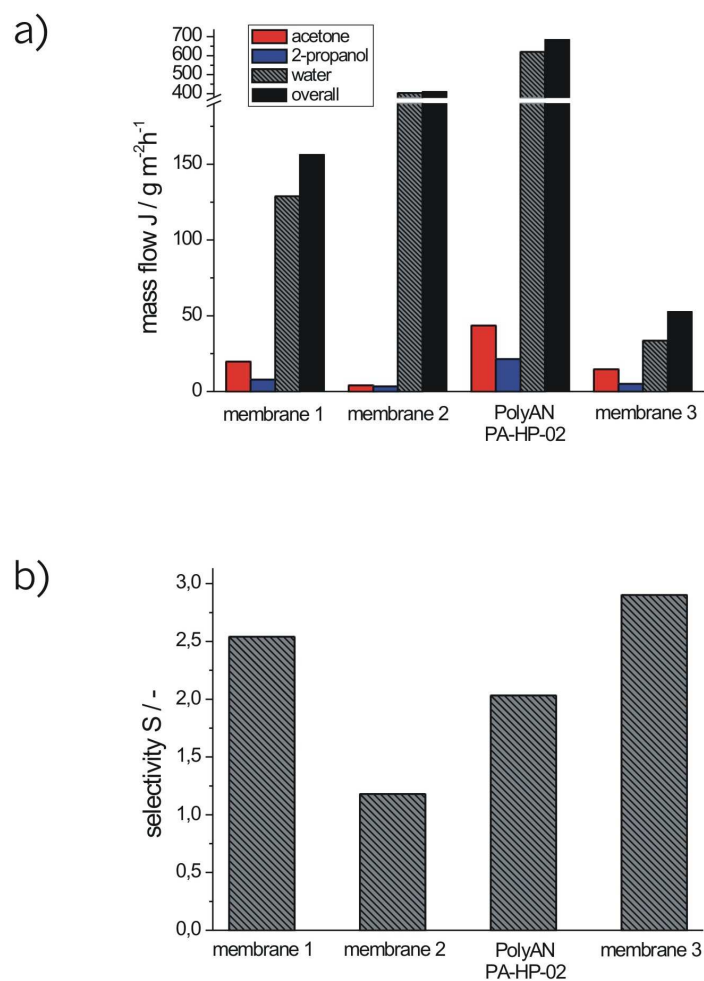

**Figure 1.** Mass flows (a) and selectivities (b) of different pervaporation membranes. Selectivity is defined as mass flow of acetone divided through mass flow of 2-propanol.

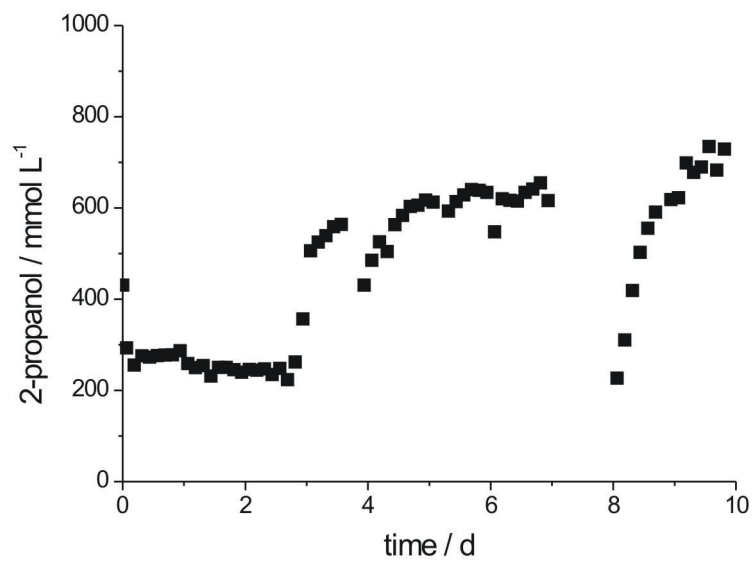

**Figure 2.** 2-propanol concentration during the continuously operated biotransformation process.
